# Supplementary material
Source: publisher figshare collection journal article supplement (https://sage.figshare.com/ndownloader/files/12440669)

## Supplemental Material

Type of reported GI symptom, according to total number of symptoms

### A. Children with 1 reported symptom

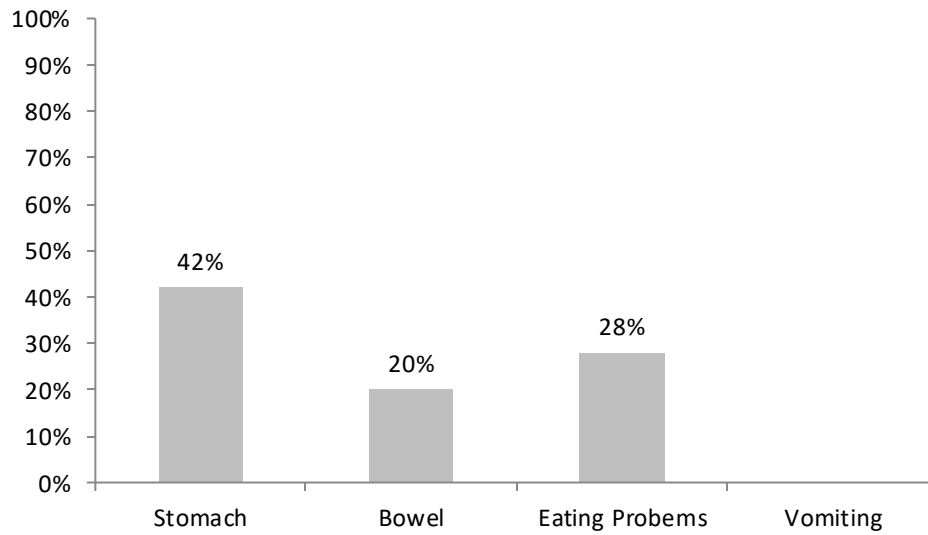

### B. Children with 2 symptoms

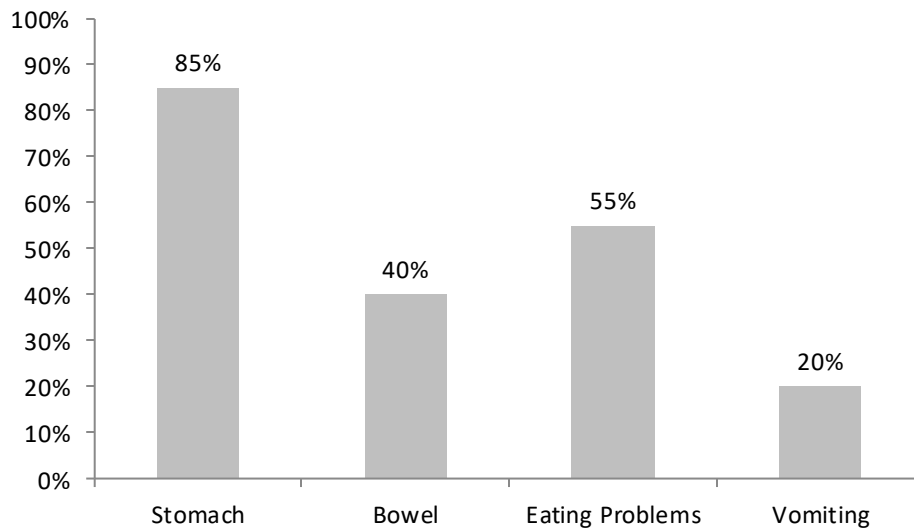

### C. Children with 3 symptoms

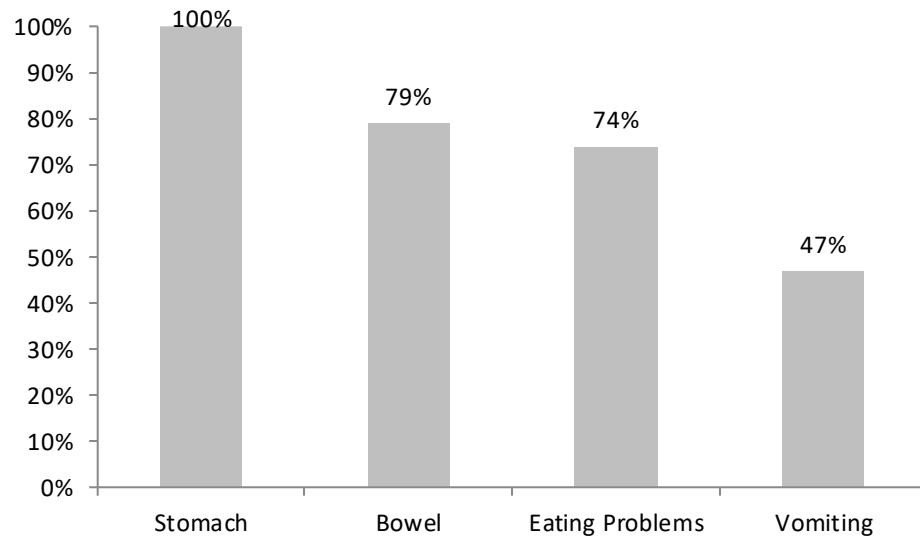

Supplement: Supplementary file 1 [file 12440669]
